# Supplementary material for: Development of a HS-SPME/GC-MS Method for the Extraction and Identification of the Volatile Compounds Emitted by Flowers of Tillandsia xiphioides
Source: PubMed Central journal article supplement — ACS Omega. 2021 May 5;6(19):12691–8. doi: 10.1021/acsomega.1c00917 (PMC8154223; doi:10.1021/acsomega.1c00917), 2021-05-05

## Supporting Information

### **Development of a HS-SPME/GC-MS method for the extraction and identification of the volatile compounds emitted by flowers of *Tillandsia xiphioides***

Mame-Marietou Lo<sup>#</sup>, Zohra Benfodda<sup>#</sup>, David Béniméris<sup>#</sup>, Jean-Xavier Fontaine<sup>1</sup>, Roland Molinie<sup>1</sup> and Patrick Meffre<sup>#\*</sup>

<sup>#</sup>UNIV. NIMES, EA7352 CHROME, 5 rue du Dr Georges Salan, F- 30021 Nîmes Cedex 1, France

<sup>1</sup>UMR INRAE 1158 Transfrontalière BioEcoAgro, BIOlogie des Plantes et Innovation (BIOPI), UPJV, UFR de Pharmacie, 1 rue des Louvels, 80037 Amiens, France

\*Corresponding author:

Fax and Phone: +33-466 279 581

E-mail: [patrick.meffre@unimes.fr](mailto:patrick.meffre@unimes.fr)

## **Table of contents**

- 1. Plant material**
- 2. Optimization of the HS-SPME extraction**
- 3. Selection of the SPME fiber**
- 4. Profiling methods**
- 5. Identification**

## 1. Plant Material

**Figure S1:** Picture of High-Pubescent *T. xiphioides* (HP-xiphi) form (A) and of Low-Pubescent *T. xiphioides* (LP-xiphi) form (B).

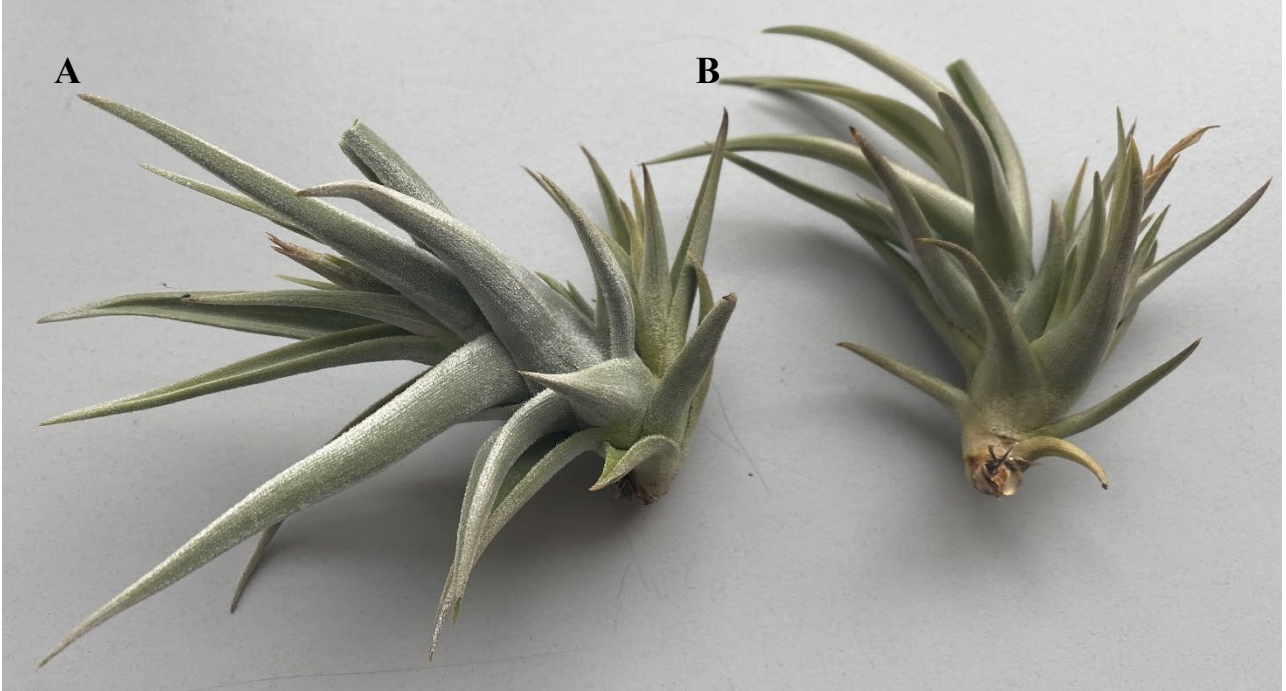

**Figure S2:** Picture of a cut leaf of High-Pubescent *T. xiphioides* (HP-xiphi) form (A) and a cut leaf of Low-Pubescent *T. xiphioides* (LP-xiphi) form (B).

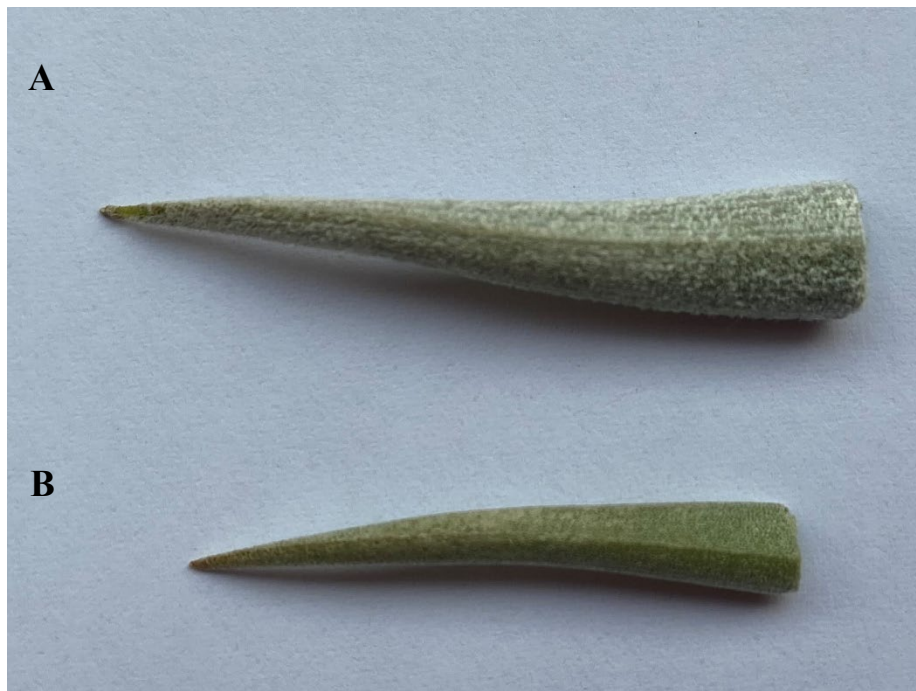

## 2. Optimization of the HS-SPME extraction

**Table S1: Face-centred composite central design (FCCD) factor levels.**

| Level<br>Factor      | -1 | 0   | 1  |
|----------------------|----|-----|----|
| X <sub>1</sub> ( °C) | 30 | 45  | 60 |
| X <sub>2</sub> (min) | 20 | 35  | 50 |
| X <sub>3</sub> (min) | 5  | 7.5 | 10 |
| X <sub>4</sub> (min) | 2  | 4   | 6  |

**Table S2: Composite central design (CCD) factor levels.**

| Level<br>Factor | - $\alpha$ | -1 | 0  | +1 | + $\alpha$ |
|-----------------|------------|----|----|----|------------|
| X <sub>1</sub>  | 35,2042    | 40 | 55 | 70 | 25,2042    |
| X <sub>2</sub>  | 74,7958    | 30 | 45 | 60 | 64,7958    |

**Table S3: Experimental conditions of the reduced central composite design.**

| Experiment Number | Experiment Name | Run Order | X <sub>1</sub> | X <sub>2</sub> |
|-------------------|-----------------|-----------|----------------|----------------|
| 1                 | N1              | 8         | 40             | 30             |
| 2                 | N2              | 2         | 70             | 30             |
| 3                 | N3              | 10        | 40             | 60             |
| 4                 | N4              | 3         | 70             | 60             |
| 5                 | N5              | 9         | 35,2042        | 45             |
| 6                 | N6              | 13        | 74,7958        | 45             |
| 7                 | N7              | 6         | 55             | 25,2042        |
| 8                 | N8              | 14        | 55             | 64,7958        |
| 9                 | N9              | 1         | 55             | 45             |
| 10                | N10             | 4         | 55             | 45             |
| 11                | N11             | 11        | 55             | 45             |
| 12                | N12             | 12        | 55             | 45             |
| 13                | N13             | 7         | 55             | 45             |
| 14                | N14             | 5         | 55             | 45             |

### 3. Selection of the SPME fiber

**Figure S3: Effect of the fiber nature on the number of extracted volatile compounds of *T. xiphioides* at 30 °C and 45 °C.**

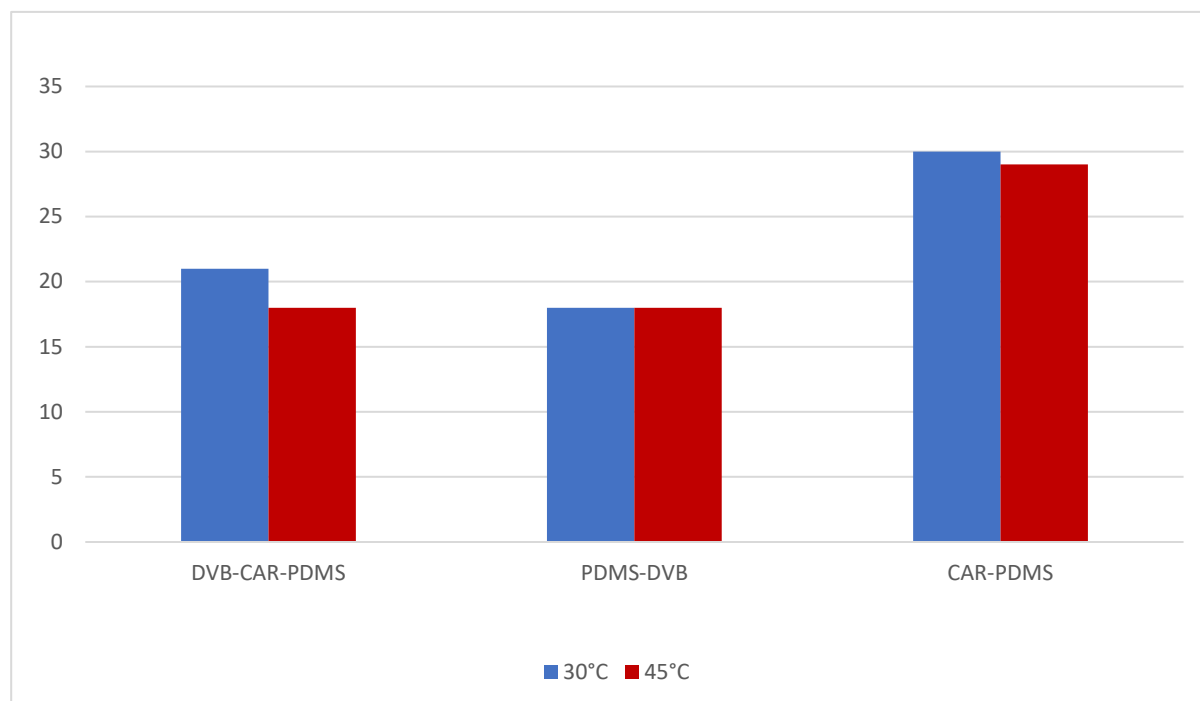

#### 4. Profiling methods

After the HS-SPME optimization step, two extraction methods were selected for profiling because they are necessary to efficiently extract the maximum amount of volatile compounds emitted by the flowers of *T. xiphioides*. The profiling was performed on 10 plants of each form of *T. xiphioides* providing 2-3 flowers each. For each *Tillandsia* flower, two successive extractions were performed using the CAR/PDMS fiber: a first extraction method of 20 minutes at a temperature of 30 °C and a second extraction method of 65 minutes at 75 °C. For both extraction methods the equilibrium and desorption times are respectively 7.5 minutes and 4 minutes.

## 5. Identification

**Figure S4: Chromatographic separation was carried out on a DB-5MS column. Complete chromatograms. A) TIC of LP-xiphi, the extraction being performed by CAR/PDMS for 20 minutes at an extraction temperature of 30 °C. B) TIC of LP-xiphi, the extraction being performed by CAR/PDMS for 60 minutes at an extraction temperature of 75 °C. C) TIC of HP-xiphi, the extraction being carried out by CAR/PDMS for 20 minutes at an extraction temperature of 30 °C. D) TIC of HP-xiphi, the extraction being carried out by CAR/PDMS for 60 minutes at an extraction temperature of 75 °C.**

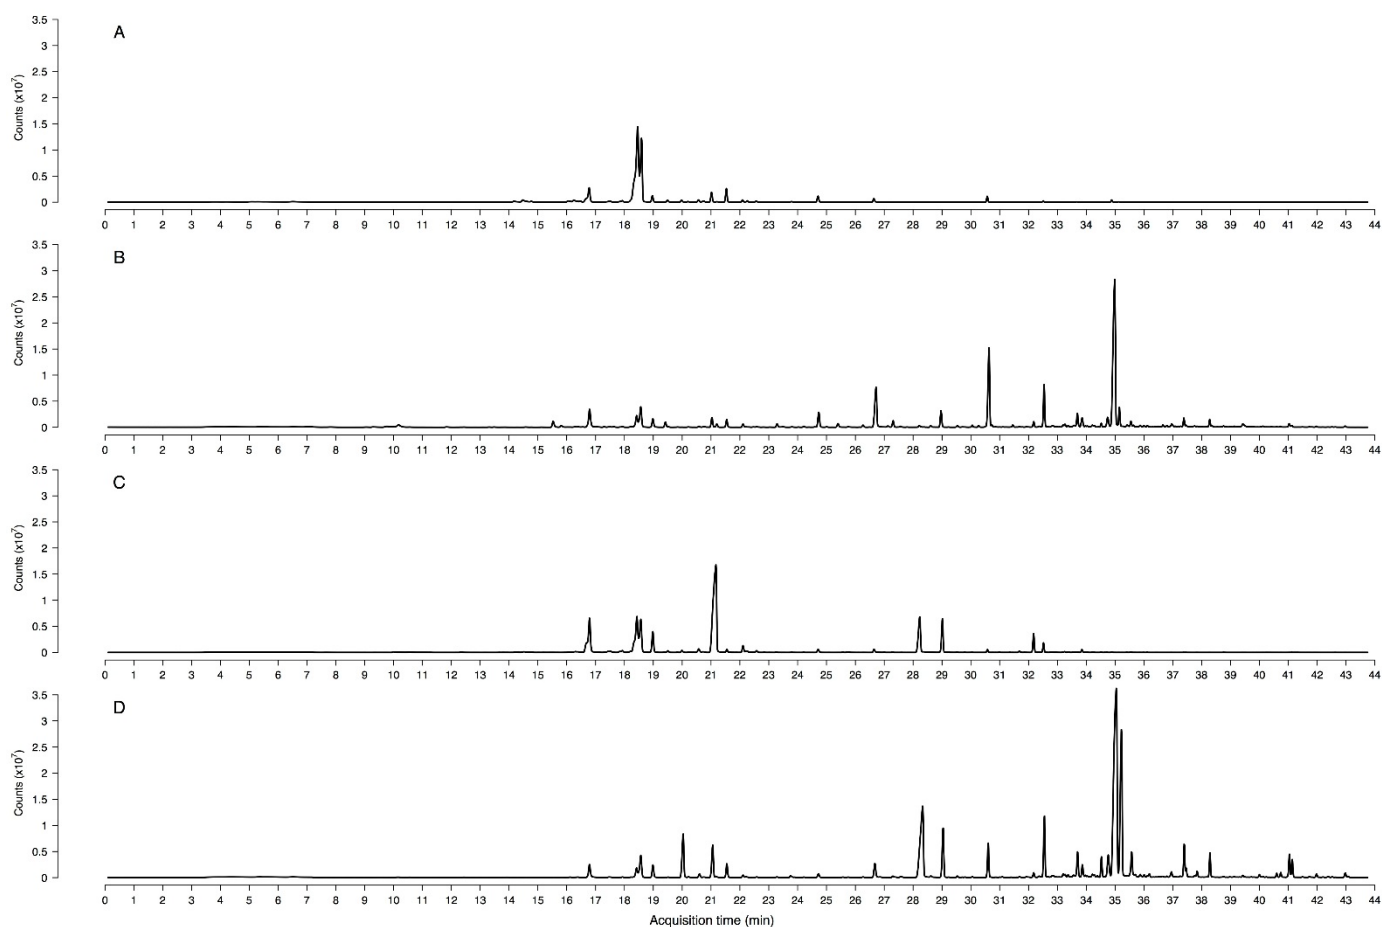

Supplement: ao1c00917_si_001.pdf [file ao1c00917_si_001.pdf]
